# Supplementary material for: Identification of a novel ene reductase from Pichia angusta with potential application in (R)-levodione production
Source: Royal Society of Chemistry journal article supplement (doi:10.1039/d2ra01716d), 2022-01-01
Supplement: d2ra01716d1.pdf [file d2ra01716d1.pdf]

## Supplementary Material

### Identification of a novel ene reductase from *Pichia angusta* with potential application in (*R*)-levodione production

**Baoqi Zhang, Jiale Sun, Yanqiu Zheng, Xinlei Mao, Jinping Lin\*, Dongzhi Wei**

State Key Laboratory of Bioreactor Engineering, New World Institute of Biotechnology, East  
China University of Science and Technology, Shanghai 200237, People's Republic of China

**Authors' email addresses:**

zhangbaoqi1992@163.com (B. Zhang), neverendsjl@163.com (J. Sun), 15957156932@163.com (Y.  
Zheng), 995698729@qq.com (X. Mao), jplin@ecust.edu.cn (J. Lin), dzhwei@ecust.edu.cn (D. Wei)

**\*Corresponding author.**

jplin@ecust.edu.cn (J. Lin) Tel.: +86 21 64251923; Fax: +86 21 64250068.

---

## Table and figure captions:

**Fig. S1** Sequence alignment of PaER with the other nine OYEs. Substrate binding sites and catalytic residue are marked with black triangles.

**Fig. S2** HPLC detection of PaER flavin species.

**Fig. S3** (A) Standard curve of size-exclusion chromatography, (B) The size-exclusion chromatography of PaER.

**Fig. S4** SDS-PAGE analysis of engineered *E. coli* cells. M: Molecular weight marker; T: whole cell lysate; S: supernatant; P: precipitate.

**Fig. S5** GC-MS spectrum of (*R*)-levodione prepared by PaER. GC-EI-MS *m/z* (*M*+ 154 for C<sub>9</sub>H<sub>14</sub>O<sub>2</sub>) 139, 111, 95, 83, 69, 56.

**Fig. S6** NMR of product (*R*)-levodione prepared by PaER.

<sup>1</sup>H NMR (400 MHz, Chloroform-*d*) δ 3.01 (dp, *J* = 13.2, 6.5 Hz, 1H), 2.81 – 2.68 (m, 2H), 2.52 (d, *J* = 15.4 Hz, 1H), 2.34 (dd, *J* = 17.7, 13.3 Hz, 1H), 1.29 – 1.10 (m, 8H).

**Table S1** List of primers sequences.

**Table S2** Comparison of PaER with other OYEs regarding half-lives.

**Table S3** Kinetic parameters of PaER.

**Table S4** Comparison of different ene-reductases for asymmetric reduction of ketoisophorone

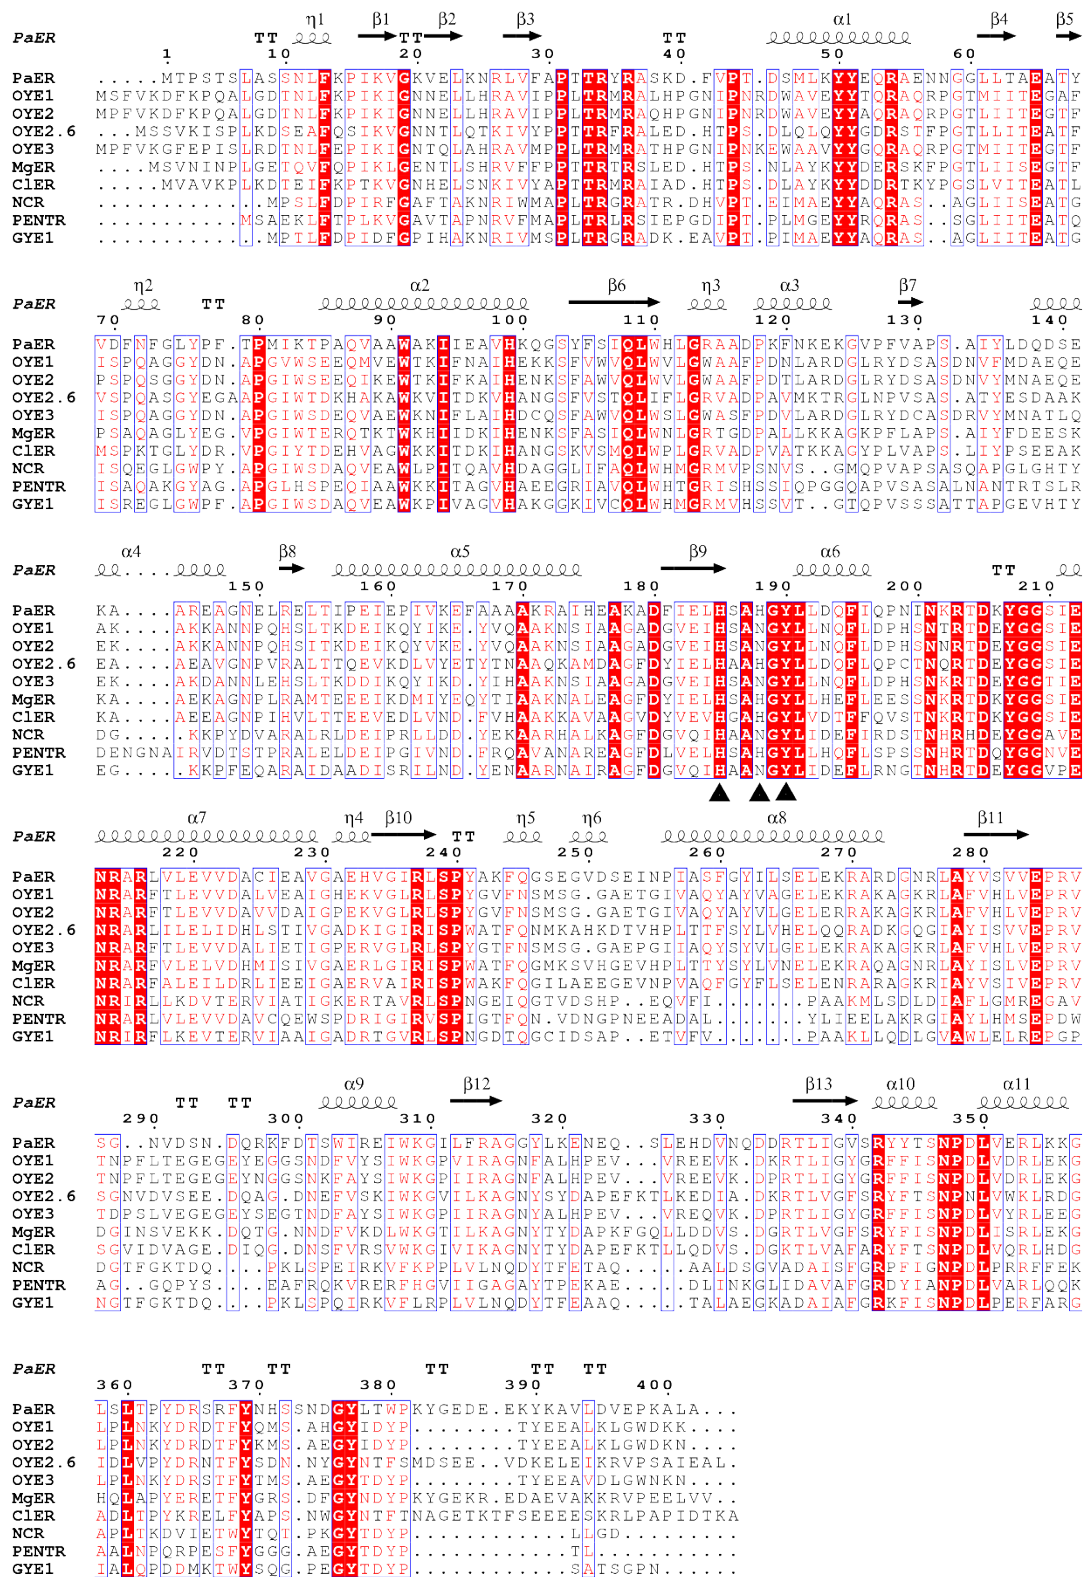

**Fig. S1** Sequence alignment of *PaER* with the other nine OYEs. Substrate binding sites and catalytic residue are marked with black triangles.

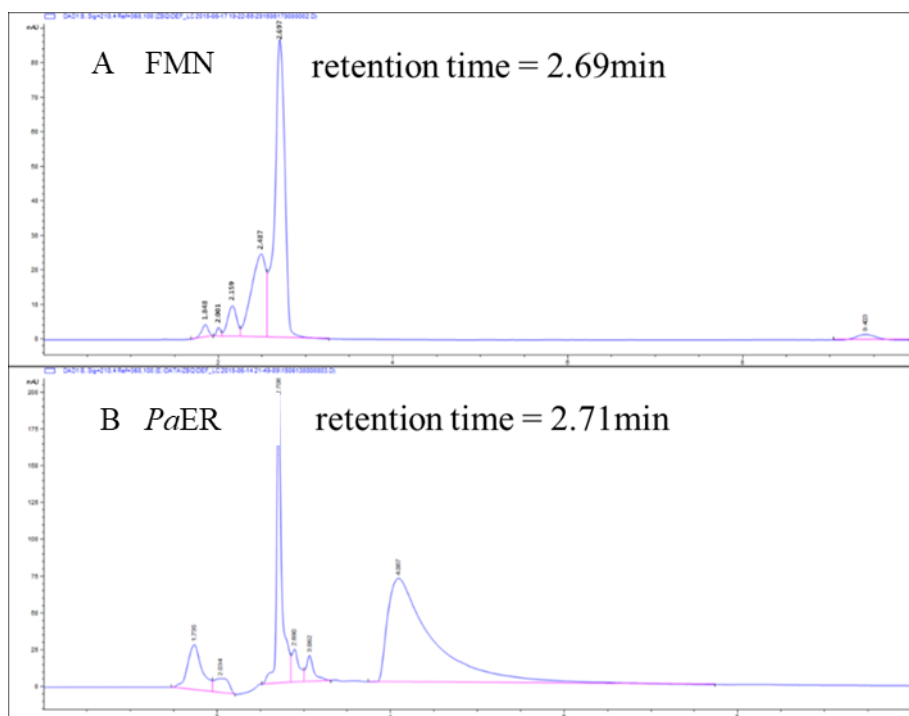

**Fig. S2** HPLC detection of *PaER* flavin species.

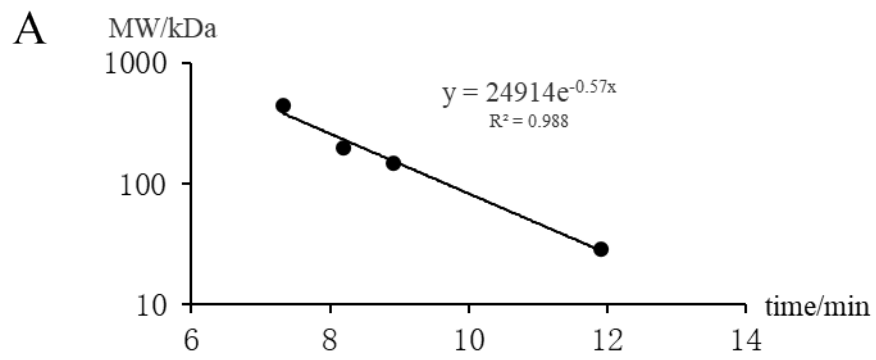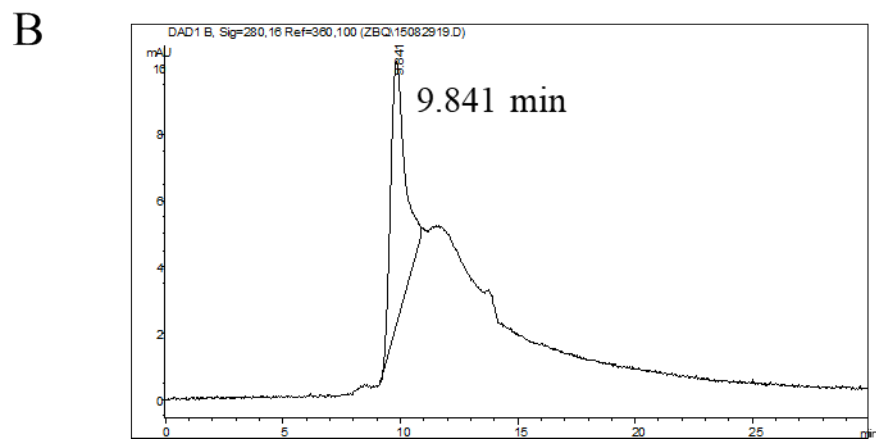

**Fig. S3** (A) Standard curve of size-exclusion chromatography, (B) The size-exclusion chromatography of *PaER*.

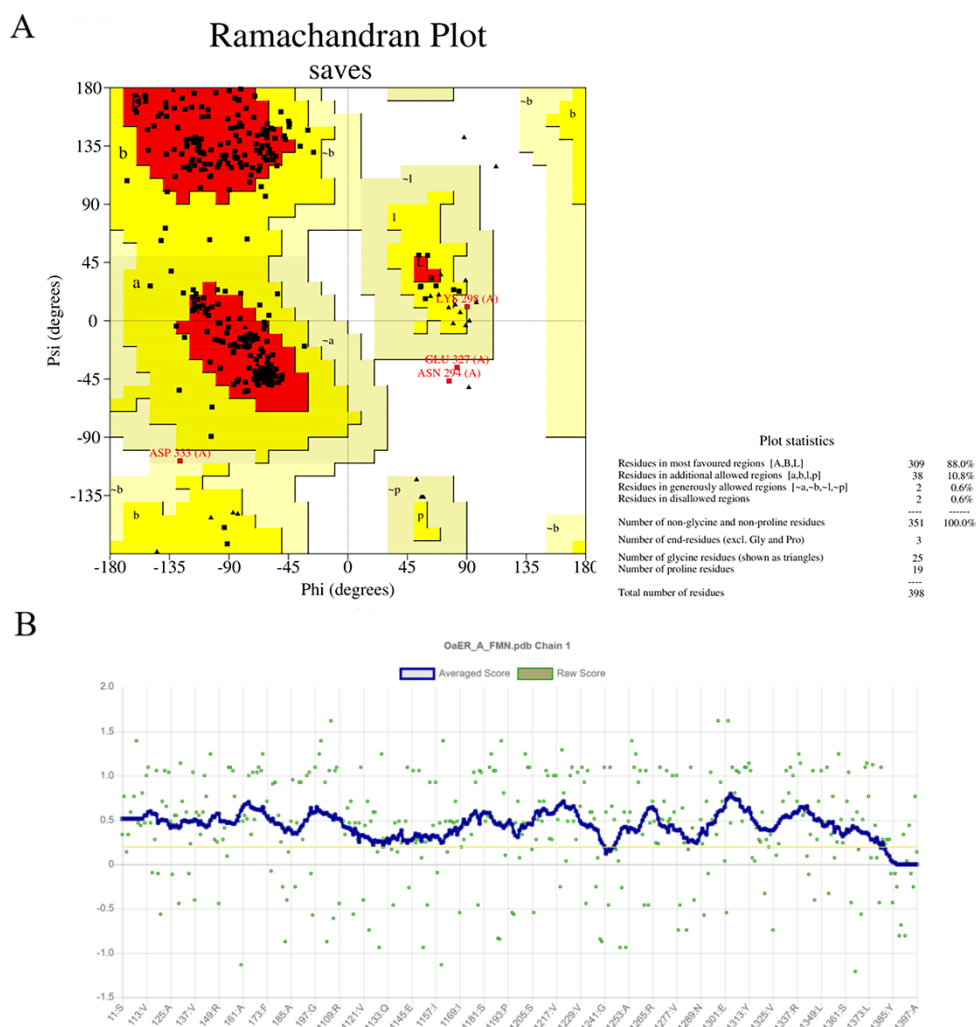

**Fig. S4** (A) The Ramachandran plot of *PaER* model evaluation. (B) The Verify-3D analysis of *PaER* model evaluation.

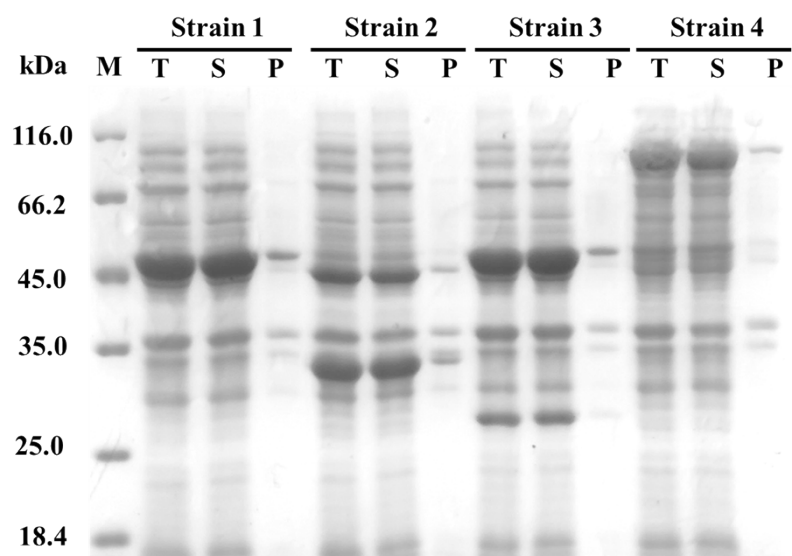

**Fig. S5** SDS-PAGE analysis of engineered *E. coli* cells. M: Molecular weight marker; T: whole cell lysate; S: supernatant; P: precipitate.

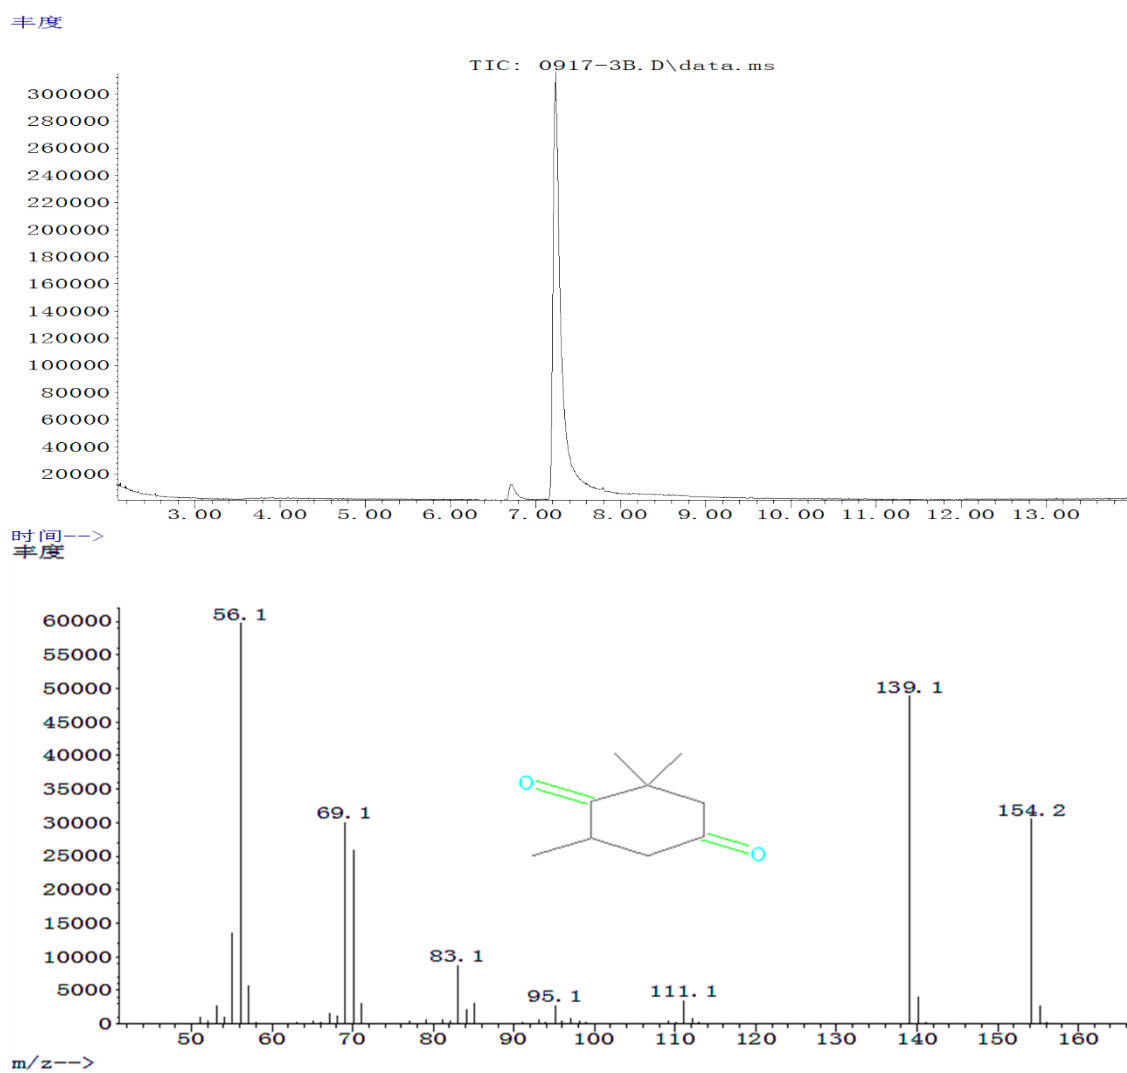

**Fig. S6** GC-MS spectrum of (*R*)-levodione prepared by *PaER*. GC-EI-MS *m/z* (*M*+ 154 for C<sub>9</sub>H<sub>14</sub>O<sub>2</sub>)

139, 111, 95, 83, 69, 56.



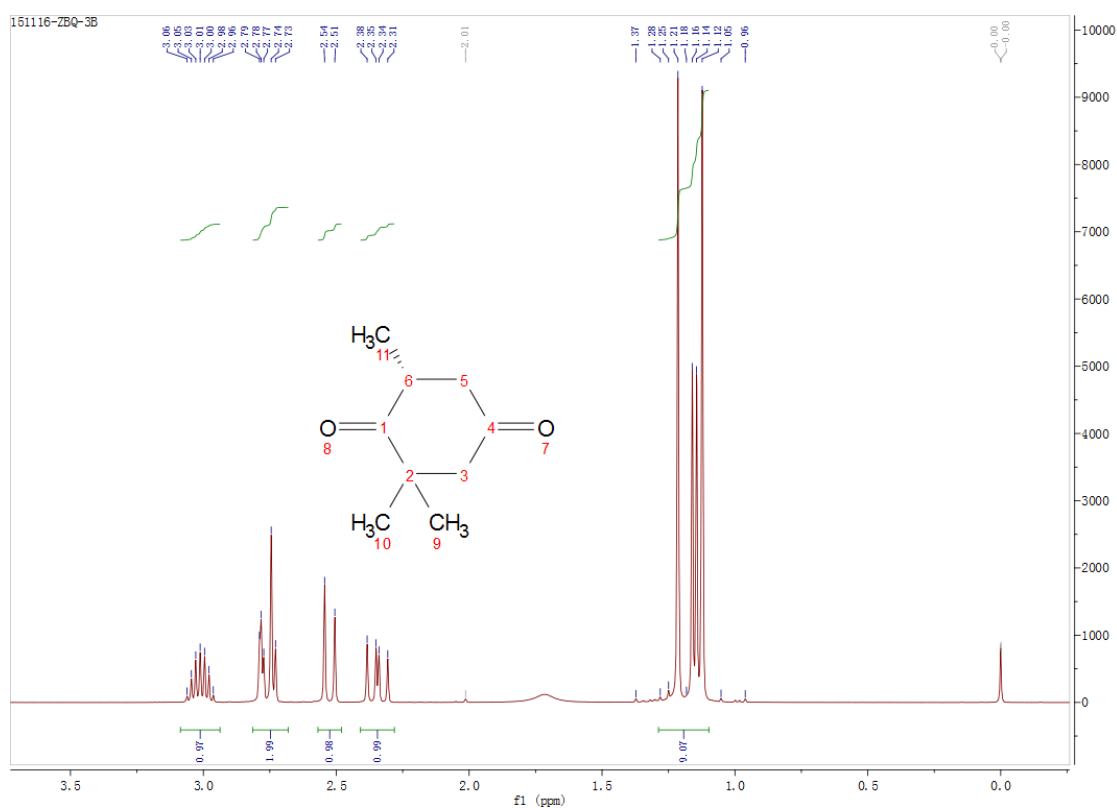

**Fig. S7** NMR of product (*R*)-levodione prepared by *Pa*ER.

<sup>1</sup>H NMR (400 MHz, Chloroform-d) δ 3.01 (dp, *J* = 13.2, 6.5 Hz, 1H), 2.81 – 2.68 (m, 2H), 2.52 (d, *J* = 15.4 Hz, 1H), 2.34 (dd, *J* = 17.7, 13.3 Hz, 1H), 1.29 – 1.10 (m, 8H).

---

**Table S1** List of primers sequences.

---

| Primer          | Sequence (5'→3')                                                    |
|-----------------|---------------------------------------------------------------------|
| PaER-F          | TGGACAGCAAATGGGT <u>CGCGGATCC</u> ATGACCCCAAGCACTTCTCT              |
| PaER-R          | GGTGCTCGAGTGCGGCCGCA <u>AAGCTT</u> CTACGCAAGGGCCTTTGGCT             |
| rbs-<br>GDH-F   | AGCCAAAGGCCCTTGCGTAGA <u>AAGCTT</u> GAAAGGAGATATACCATGGGC           |
| GDH-R           | TGGTGCTCGAGTGCGGCCGCA <u>AAGCTT</u> TTAACCGCGGCCTGCCTG              |
| MCS1-<br>PaER-F | TTAAGAAGGAGATATAC <u>CCATGGT</u> TATGACCCCAAGCACTTCTCTT             |
| MCS1-<br>PaER-R | TGTCGACCTGCAGGCGCGCC <u>GAGCTC</u> CTACGCAAGGGCCTTTGGCT             |
| MCS2-<br>GDH-F  | GTATAAGAAGGAGATATAC <u>CATATG</u> GCAGATCTCATGTATCCGGATTTAAAA<br>GG |
| MCS2-<br>GDH-R  | CCGGCCGATATCCAATTG <u>AAGATCT</u> TTAACCGCGGCCTGCCTGGA              |
| GDH-<br>ERK-F   | ATTCCAGGCAGGCCGCGGTGAAGAAGAGGAAAAAAGAAACAG                          |
| PaER-<br>ERK-R  | CAAGAGAAGTGCTTGGGGTCATGGATCCTTTTTTCTTACGTTTTTC                      |

---

**Table S2** Comparison of *PaER* with other OYEs regarding half-lives.

| Enzyme      | Species                          | Temperature (°C) | half-life | Reference  |
|-------------|----------------------------------|------------------|-----------|------------|
| OYERo2      | <i>Rhodococcus opacus</i>        | 32               | 28 min    | 1          |
| OYERo2a     | <i>Rhodococcus opacus</i>        | 32               | 87 min    | 1          |
| FOYE-1      | <i>Ferrovum</i> sp. JA12         | 50               | 5 h       | 2          |
| OYE2p       | <i>Saccharomyces cerevisiae</i>  | 40               | 11 h      | 3          |
| ClER        | <i>Clavispora lusitaniae</i>     | 40               | 36 h      | 4          |
| MgER        | <i>Meyerozyma guilliermondii</i> | 40               | 60 h      | 5          |
| CrOYE3      | <i>Chlamydomonas reinhardtii</i> | 40               | 46 h      | 6          |
| CrOYE1      | <i>Chlamydomonas reinhardtii</i> | 40               | 137 h     | 6          |
| CrOYE2      | <i>Chlamydomonas reinhardtii</i> | 40               | 134 h     | 6          |
| <i>PaER</i> | <i>Pichia angusta</i>            | 40               | 89 h      | This study |

**Table S3** Kinetic parameters of *PaER*.

| Substrate                                                                             | $K_m$ (mM) | $k_{cat}$ (s <sup>-1</sup> ) | $k_{cat}/K_m$ (s <sup>-1</sup> mM <sup>-1</sup> ) |
|---------------------------------------------------------------------------------------|------------|------------------------------|---------------------------------------------------|
| 3a 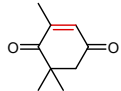  | 0.33       | 3.57                         | 10.64                                             |
| 10a  | 0.064      | 2.42                         | 37.66                                             |
| 12a  | 0.038      | 0.54                         | 14.45                                             |

**Table S4** Comparison of different ene-reductases for asymmetric reduction of ketoisophorone

| Catalyst                         | Source                              | Concentration (mM) | Cofactor                     | Conversion (%) | <i>ee</i> (%)/config. | Reference  |
|----------------------------------|-------------------------------------|--------------------|------------------------------|----------------|-----------------------|------------|
| XenA                             | <i>Pseudomonas putida</i>           | 5                  | NADP <sup>+</sup> / 0.2 mM   | 98.9           | 2.25 ( <i>S</i> )     | 7          |
| PETNR                            | <i>Enterobacter cloacae</i> st. PB2 | 5                  | NADP <sup>+</sup> /0.01 mM   | >99            | 57 ( <i>R</i> )       | 8          |
| Gox0502 <sup>a</sup>             | <i>Gluconobacter. oxydans</i>       | 10                 | NADP <sup>+</sup> / 0.5 mM   | >99            | >99 ( <i>R</i> )      | 9          |
| SynER                            | <i>Synechococcus</i> sp. PCC 7942   | 10                 | NADP <sup>+</sup> /0.5 mM    | 93%            | 97 ( <i>R</i> )       | 10         |
| TsER C25D/I67T                   | <i>Thermus scotoductus</i> SA-01    | 125                | NADP <sup>+</sup> /0.41 mM   | >99            | 98 ( <i>R</i> )       | 11         |
| CIER                             | <i>Clavispora lusitaniae</i>        | 500                | NADP <sup>+</sup> / 0.5 mM   | >99            | 98 ( <i>R</i> )       | 4          |
| CYE                              | <i>Candida macedoniensis</i>        | 658                | NADP <sup>+</sup> / 0.784 mM | 95.4           | n.d.                  | 12         |
| <i>Geobacillus</i> ene reductase | <i>Geobacillus</i> sp. 30           | 1000               | NADH/1.0 mM                  | 63.2           | 89.2 ( <i>R</i> )     | 13         |
| PaER                             | <i>Pichia angusta</i>               | 1000               | NADP <sup>+</sup> /0.2 mM    | >99%           | >99 ( <i>R</i> )      | This study |

---

## REFERENCES

1. A. Riedel, M. Mehnert, C. E. Paul, A. H. Westphal, W. J. van Berkel and D. Tischler, *Front Microbiol*, 2015, **6**, 1073.
2. A. Scholtissek, S. R. Ullrich, M. Muhling, M. Schlomann, C. E. Paul and D. Tischler, *Applied microbiology and biotechnology*, 2017, **101**, 609-619.
3. L. Zheng, J. Lin, B. Zhang, Y. Kuang and D. Wei, *Bioresources and Bioprocessing*, 2018, **5**, 9.
4. Y. Ni, H. L. Yu, G. Q. Lin and J. H. Xu, *Enzyme and microbial technology*, 2014, **56**, 40-45.
5. B. Zhang, L. Zheng, J. Lin and D. Wei, *Biotechnology letters*, 2016, **38**, 1527-1534.
6. S. Böhmer, C. Marx, Á. Gómez-Baraibar, M. M. Nowaczyk, D. Tischler, A. Hemschemeier and T. Happe, *Algal Research*, 2020, **50**, 101970.
7. Y. Yanto, H. H. Yu, M. Hall and A. S. Bommarius, *Chemical communications*, 2010, **46**, 8809-8811.
8. M. Kataoka, A. Kotaka, R. Thiwthong, M. Wada, S. Nakamori and S. Shimizu, *Journal of biotechnology*, 2004, **114**, 1-9.
9. N. Richter, H. Groger and W. Hummel, *Applied microbiology and biotechnology*, 2011, **89**, 79-89.
10. Y. Fu, K. Hoelsch and D. Weuster-Botz, *Process Biochemistry*, 2012, **47**, 1988-1997.
11. N. Nett, S. Duedel, L. Schmermund, G. E. Benary, K. Ranaghan, A. Mulholland, D. J. Opperman and S. Hoebenreich, *Molecular Catalysis*, 2021, **502**, 111404.
12. M. Kataoka, A. Kotaka, R. Thiwthong, M. Wada, S. Nakamori and S. Shimizu, *Journal of biotechnology*, 2004, **114**, 1-9.
13. N. Tsuji, K. Honda, M. Wada, K. Okano and H. Ohtake, *Applied microbiology and biotechnology*, 2014, **98**, 5925-5935.
